# Supplementary material
Source: publisher site journal article supplement (https://www.spandidos-publications.com/8113/downloadSupplementary)
Supplement: Supplementary file 1 [file downloadSupplementary]

**Table SI.** The sequences of primers used in the present study.

| <b>Primers</b> | <b>Sequences (5'-3')</b>  |
|----------------|---------------------------|
| H-GPR176-F     | TCTTCATAGGCTCGCTGCTC      |
| H-GPR176-R     | AATGAACTTAATCCCAGGCAGT    |
| H-E-cad-F      | TACCCTGGTGGTTCAAGCTG      |
| H-E-cad-R      | CAAATCCAAGCCCGTGGTG       |
| H-N-cad-F      | ATGGGAAATGGAACTTGATGGC    |
| H-N-cad-R      | AGCTTCTCACGGCATAACACC     |
| H-vimentin-F   | GGACCAGCTAACCAACGACA      |
| H-vimentin-R   | AAGGTCAAGACGTGCCAGAG      |
| H-snail-F      | TAGAGTCTGAGATGCCCCGA      |
| H-snail-R      | ACAGCCATTACTCACAGTCCC     |
| H-ACTB-F       | AGTCATTCCAAATATGAGATGCGTT |
| H-ACTB-R       | TGCTATCACCTCCCCTGTGT      |
| H-PIP5K1A -F   | AAGATTCCCTGCGTTCACCT      |
| H-PIP5K1A -R   | AGGCTTTGCGCTTAATGGGT      |

F, forward; R, reverse; H, Human.

**Table SII.** The functional sequence of the shRNA lentiviral vector.

|              | <b>Sequence (5'-3')</b>         |
|--------------|---------------------------------|
| NC           | Sense UUCUCCGAACGUFUCACGUTT     |
|              | Antisense ACGUGACACGUUCGGAGAATT |
| sh-Gpr176-1  | Sense UUUAAUCCUAAAGUUUGCAU      |
|              | Antisense GCAAACUUUAGGAAUUAAAAG |
| sh-Gpr176-2  | Sense AAUGAUUGUGAAAGCUUUGAA     |
|              | Antisense CAAAGCUUUCACAAUCAUUAC |
| sh-Gpr176-3  | Sense AAUGAUUGUGAAAGCUUUGAA     |
|              | Antisense CAAAGCUUUCACAAUCAUUAC |
| sh-PIP5K1A-1 | Sense UGAAAAAAAAUCAAUAGUGGA     |
|              | Antisense CACUAUUGAAUUUUUUUCAGA |
| sh-PIP5K1A-2 | Sense AGUAAUAAUUACUAUAGCCUG     |
|              | Antisense GGCUAUAGUAAUUAUUACUAU |
| sh-PIP5K1A-3 | Sense AAUAGCAAGAAUUCUUUCCUU     |
|              | Antisense GGAAAGAAUUCUUGCUAUUUU |

sh, short hairpin; NC, negative control.

**Table SIII.** Antibody information and usage concentrations for the present study.

| <b>Antibody</b> | <b>Manufacturer</b>                             | <b>Cat. no.</b> | <b>Dilution</b> |
|-----------------|-------------------------------------------------|-----------------|-----------------|
| B-Actin         | Beijing Solarbio Science & Technology Co., Ltd. | K006153P        | 1:2,000         |
| E-cadherin      | Proteintech Group, Inc.                         | 20874-1-AP      | 1:1,000         |
| Vimentin        | Proteintech Group, Inc. Proteintech Group, Inc. | 10366-1-AP      | 1:5,000         |
| N-cadherin      | Proteintech Group, Inc.                         | 22018-1-AP      | 1:6,000         |
| GPR176          | Abcam                                           | ab184558        | 1:2,000         |
| AKT             | Proteintech Group, Inc.                         | 10176-2-AP      | 1:12,000        |
| p-AKT           | Proteintech Group, Inc.                         | 28731-1-AP      | 1:6,000         |
| PIP5K1A         | Proteintech Group, Inc.                         | 15713-1-AP      | 1:50,000        |
| mTOR            | Proteintech Group, Inc.                         | 28273-1- AP     | 1:10,000        |
| p-mTOR          | Proteintech Group, Inc.                         | 80596-1-RR      | 1:50,000        |

**Table SIV.** Cox regression analysis of GPR176 expression as survival predictor.

| Variables                           | Univariate Cox regression analysis |         | Multivariate Cox regression analysis |         |
|-------------------------------------|------------------------------------|---------|--------------------------------------|---------|
|                                     | RR (95% CI)                        | P-value | RR (95% CI)                          | P-value |
| Age (years): ≥60 vs. <60            | 1.486(1.036 to 2.130)              | 0.031   | 1.781 (1.214 to 2.613)               | 0.003   |
| Men vs. women                       | 1.280 (0.912 to 1.798)             | 0.154   | 1.384 (0.959 to 1.997)               | 0.083   |
| Pathological stage: III/IV vs. I/II | 1.915 (1.362 to 2.692)             | <0.001  | 1.218 (1.218 to 2.690)               | 0.447   |
| T stage: T3+T4 vs. T1+T2            | 1.813 (1.215 to 2.707)             | 0.004   | 1.234 (0.761 to 2.002)               | 0.394   |
| N staging: Positive vs. negative    | 1.947 (1.312 to 2.888)             | 0.001   | 1.514 (0.880 to 2.604)               | 0.134   |
| M stage: Positive vs. Negative      | 2.447 (1.408 to 4.250)             | 0.001   | 2.291 (1.258 to 4.172)               | 0.007   |
| Histological grade: G3 vs. G1+G2    | 1.419 (1.017 to 1.980)             | 0.040   | 1.399 (0.973 to 2.012)               | 0.070   |
| GPR176 expression: High vs. low     | 1.371 (1.001 to 1.883)             | 0.048   | 1.281(0.912 to 1.800)                | 0.036   |

NA, not analyzed; RR, Risk Ratio.
